## CORRECTION

# Correction: Cell Therapy: A Safe and Efficacious Therapeutic Treatment for Alzheimer's Disease in APP+PS1 Mice

Neel R. Nabar, Fang Yuan, Xiaoyang Lin, Li Wang, Ge Bai, Jonathan Mayl, Yaqiong Li, Shu-Feng Zhou, Jinhuan Wang, Jianfeng Cai, Chuanhai Cao

In [Fig 9](#) of [\[1\]](#), panel A was erroneously duplicated in panel F. In the corrected version of [Fig 9](#), provided here, the correct image from the original experiment is shown in panel F. The underlying image data for [Fig 9](#) are in [S1 File](#). The authors additionally provide an annotated version of [Fig 9E](#) to assist visualization of T-Cell infiltration in this panel ([S2 File](#)).

The underlying data supporting other results in the article are no longer available due to deletion in accordance with institutional policy.

Reference 35 in the article [\[1\]](#) is incomplete. The correct reference is:

35. Postupna N, Rose SE, Bird TD, Gonzalez-Cuyar LF, Sonnen JA, et al. (2012) Novel Antibody Capture Assay for Paraffin-Embedded Tissue Detects Wide-Ranging Amyloid Beta and Paired Helical Filament-Tau Accumulation in Cognitively Normal Older Adults. *Brain Pathol.* 22(4): 472–484. doi: 10.1111/j.1750-3639.2011.00542.x

The authors apologize for the errors in the published article.

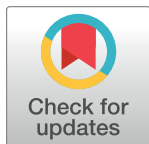

## OPEN ACCESS

**Citation:** Nabar NR, Yuan F, Lin X, Wang L, Bai G, Mayl J, et al. (2024) Correction: Cell Therapy: A Safe and Efficacious Therapeutic Treatment for Alzheimer's Disease in APP+PS1 Mice. *PLoS ONE* 19(5): e0303619. <https://doi.org/10.1371/journal.pone.0303619>

**Published:** May 9, 2024

**Copyright:** © 2024 Nabar et al. This is an open access article distributed under the terms of the [Creative Commons Attribution License](#), which permits unrestricted use, distribution, and reproduction in any medium, provided the original author and source are credited.

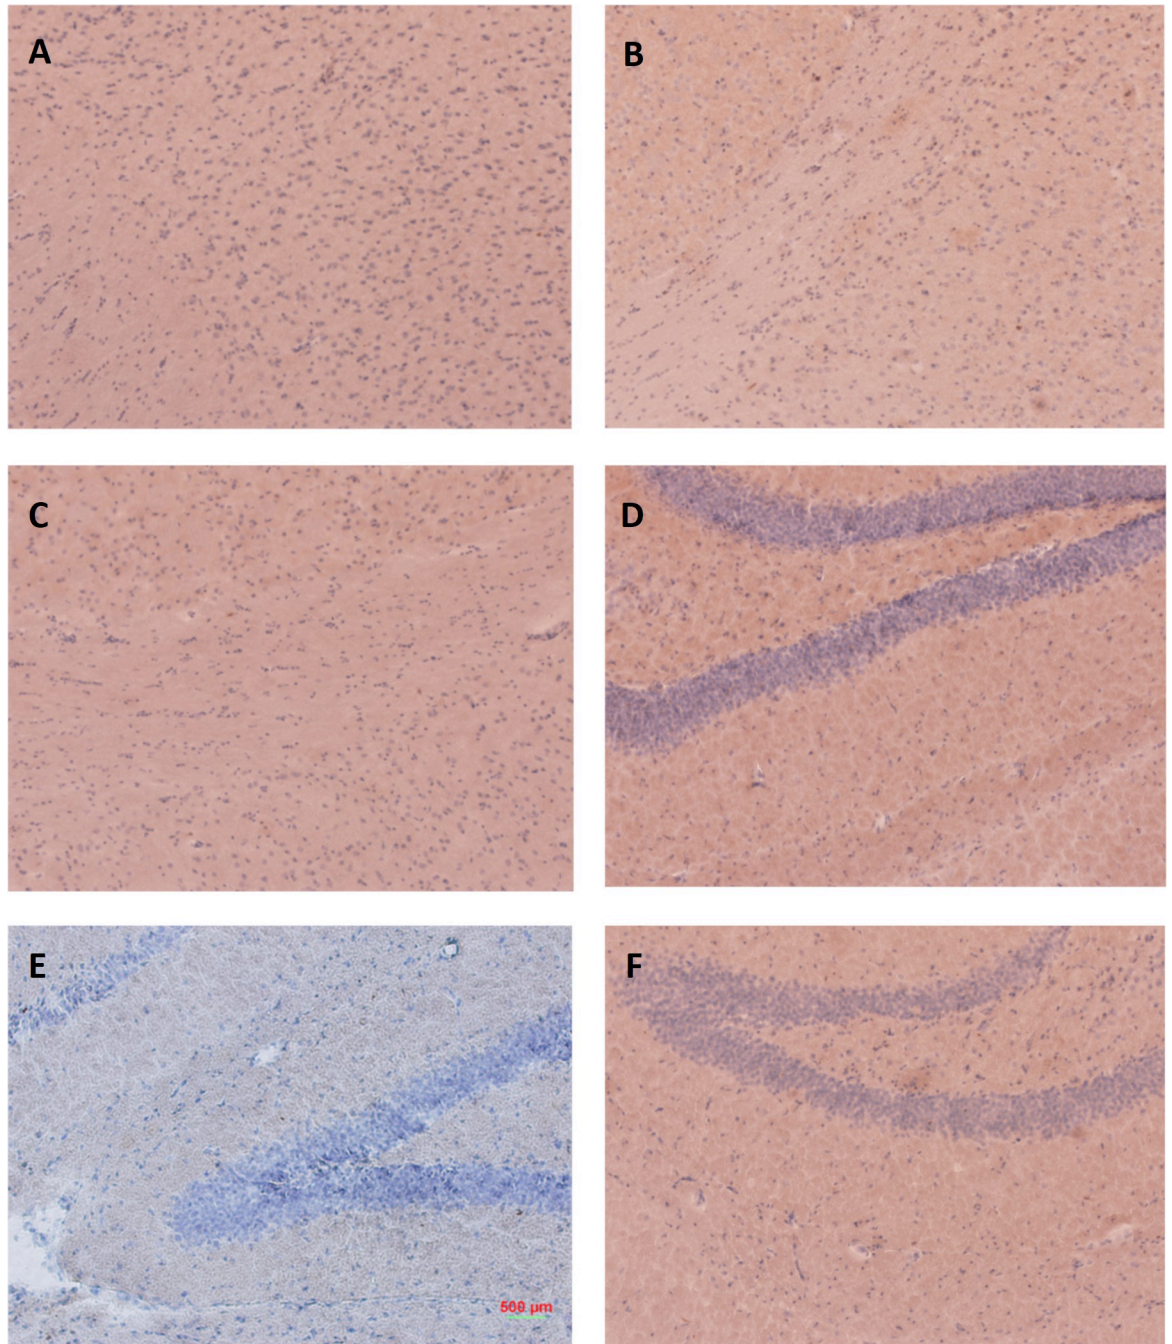

**Fig 9. CD3 staining.** A) Non-Tg PDFM Cortex B) Tg Control Cortex C) Tg PDFM Cortex D) Non-Tg PDFM Hippocampus E) Tg Control Hippocampus F) Tg PDFM Hippocampus. Some T-Cell infiltration was observed in the hippocampi of the Tg control group, but not in any treatment groups. All images were captured at 10×magnification.

<https://doi.org/10.1371/journal.pone.0303619.g001>

## Supporting information

**S1 File. Underlying images for Fig 9.**

(ZIP)

**S2 File. Annotated version of Fig 9E.**  
(JPG)

## Reference

1. Nabar NR, Yuan F, Lin X, Wang L, Bai G, Mayl J, et al. (2012) Cell Therapy: A Safe and Efficacious Therapeutic Treatment for Alzheimer's Disease in APP+PS1 Mice. PLoS ONE 7(12): e49468. <https://doi.org/10.1371/journal.pone.0049468> PMID: [23226497](https://pubmed.ncbi.nlm.nih.gov/23226497/)
